# Supplementary material
Source: publisher figshare collection journal article supplement (https://tandf.figshare.com/articles/dataset/_/11734173)
Supplement: Supplementary file 1 [file 1]

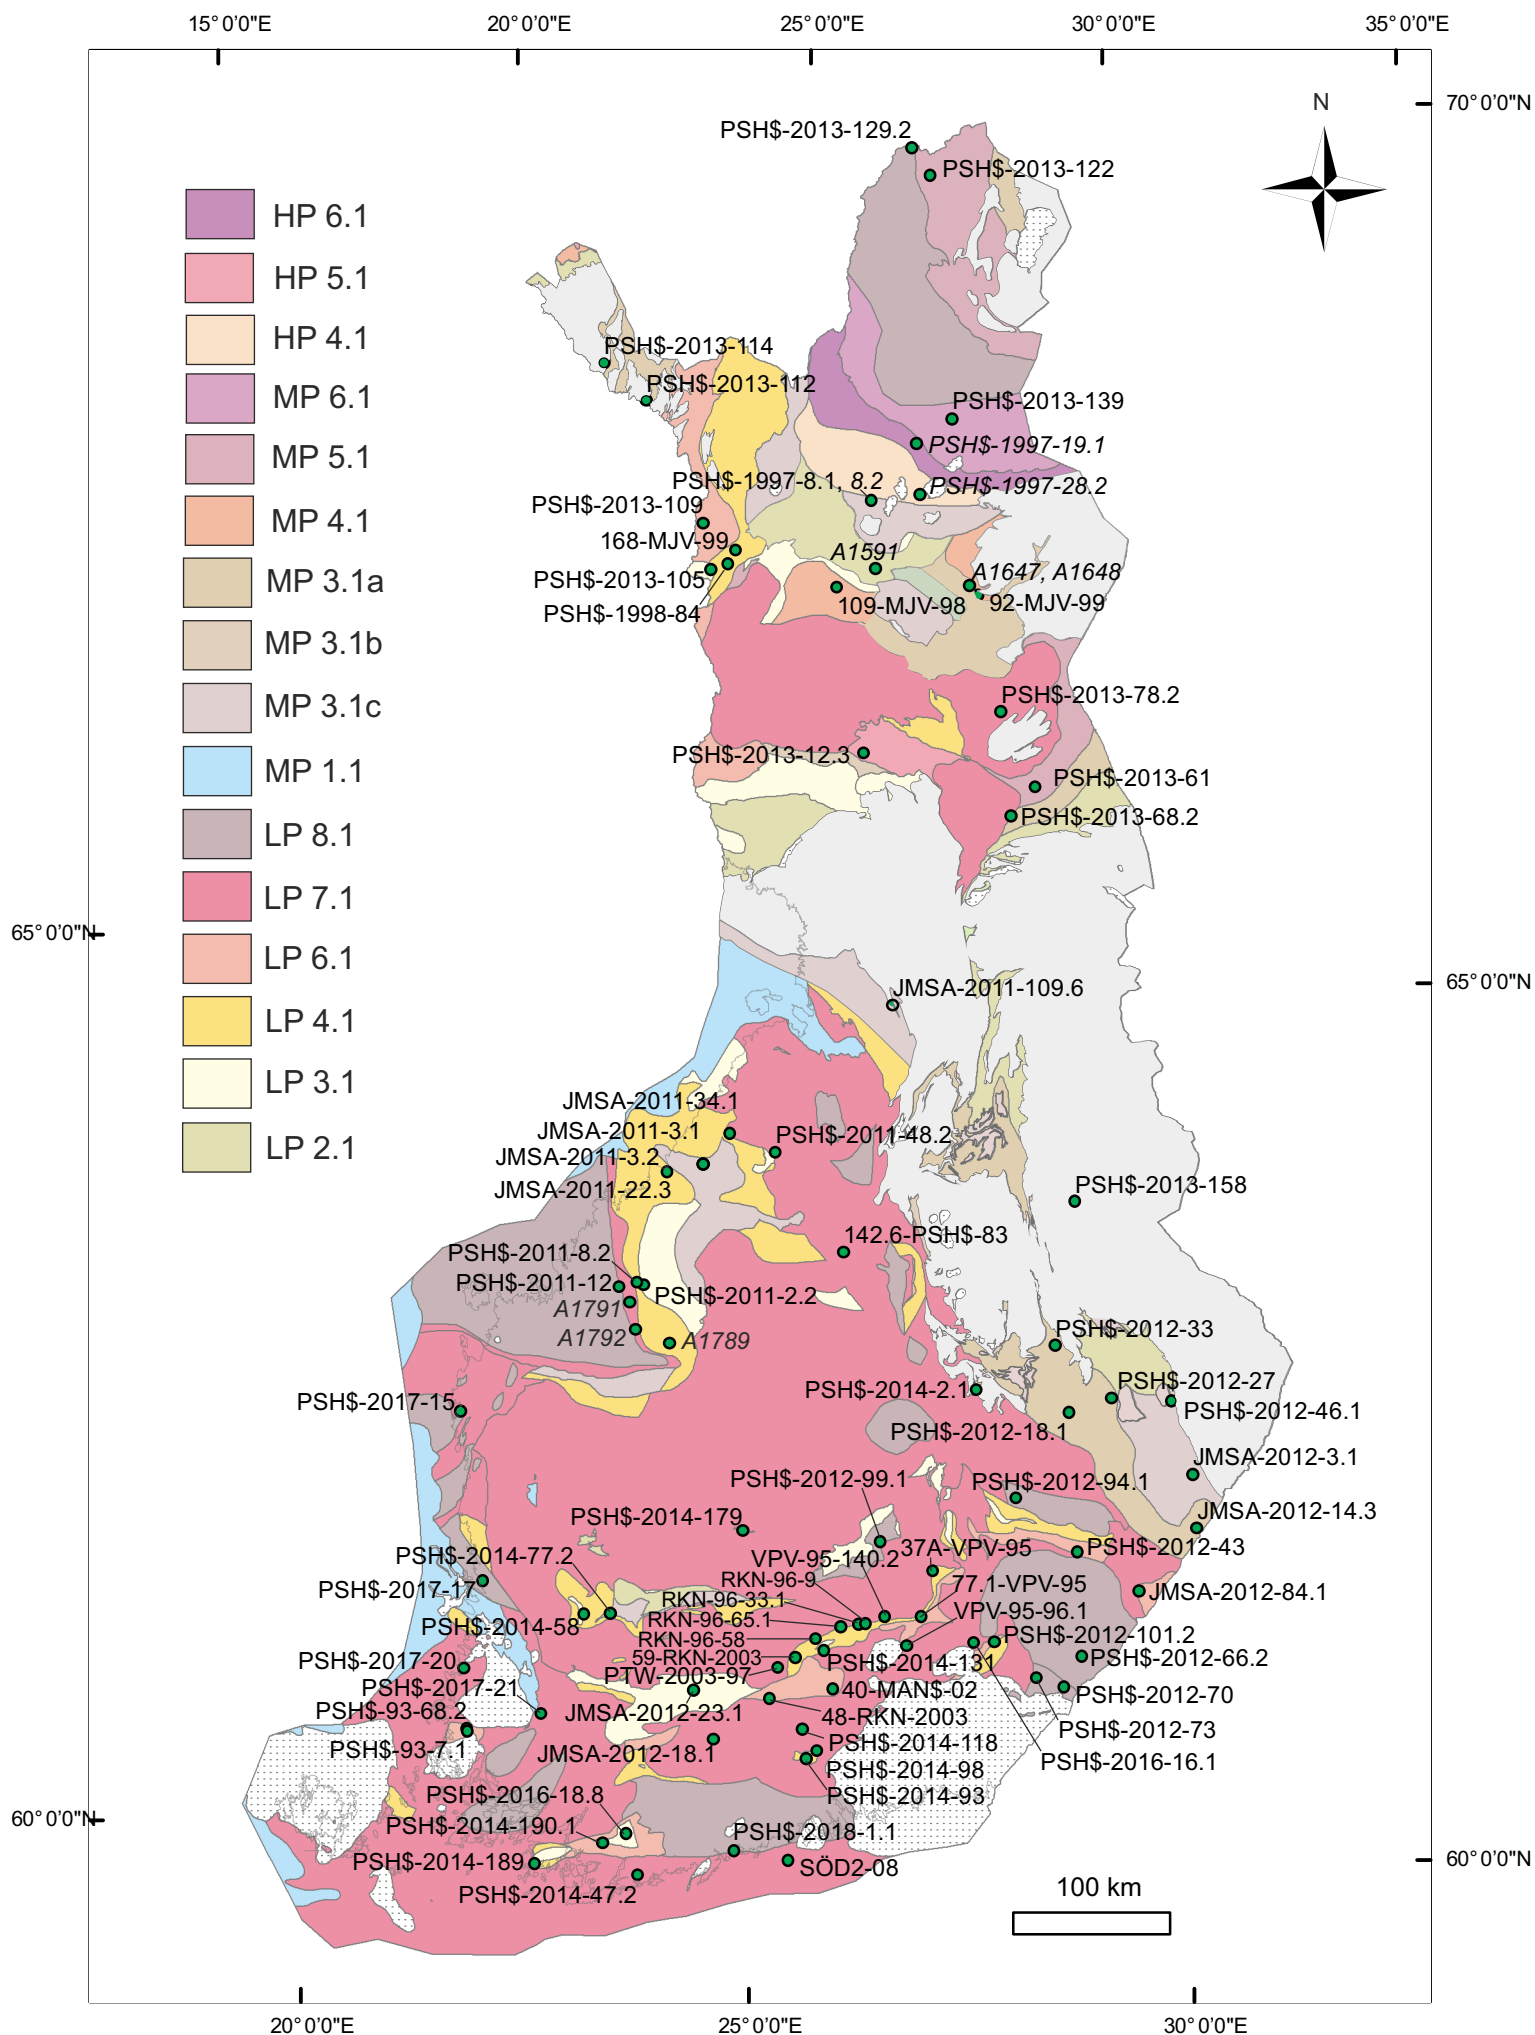

Appendix 4. Location of the samples presented in Fig. 5 and Appendices 1-3 on the metamorphic map of Finland. The abbreviations of the legend are explained in Table 1.
