# Supplementary material
Source: publisher figshare collection journal article supplement (https://tandf.figshare.com/articles/dataset/_/11734173)
Supplement: Supplementary file 2 [file 1]

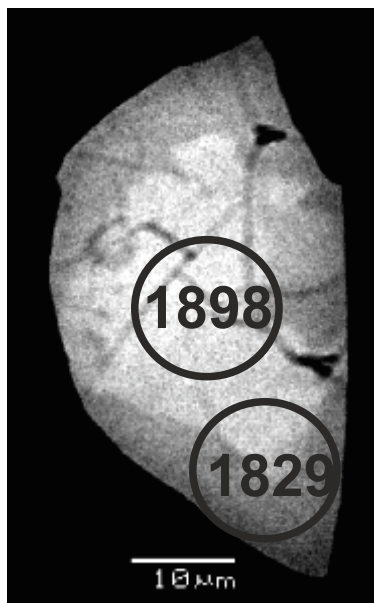

PSH\$-2014-47-g12

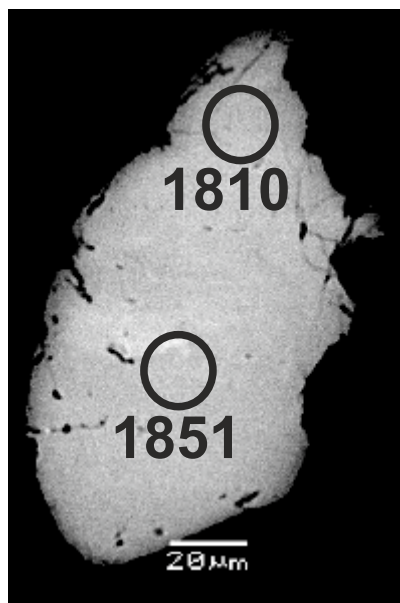

PSH\$-2014-98-g 13

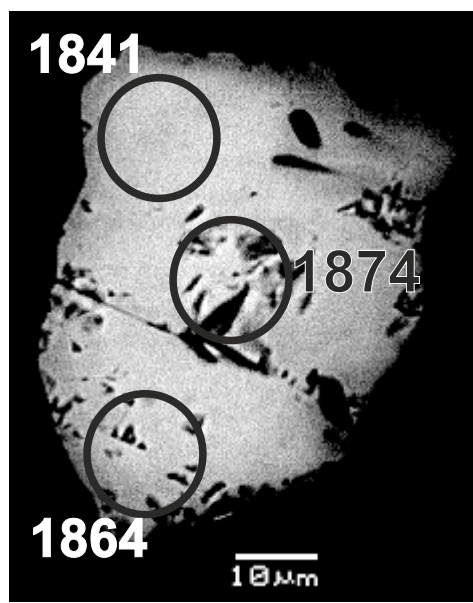

RKN-96-33.1 g 13

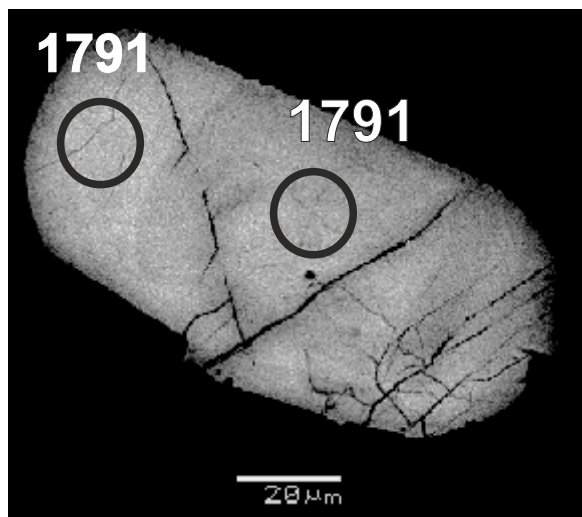

PSH\$-2012-66.2 g 2

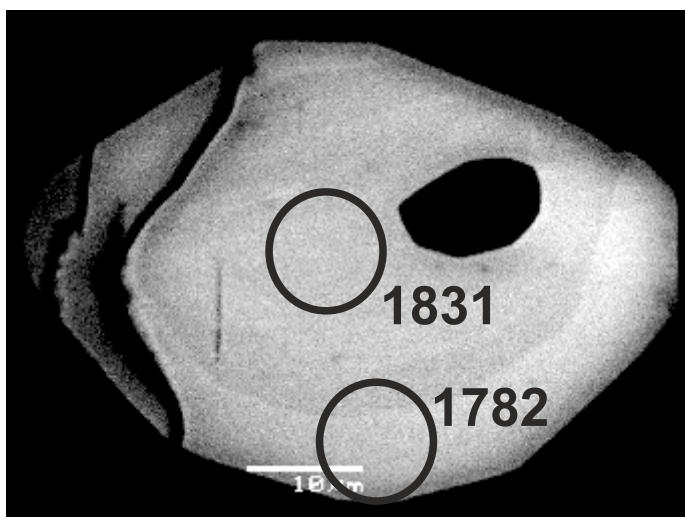

PSH\$-2012-66.2 g 7

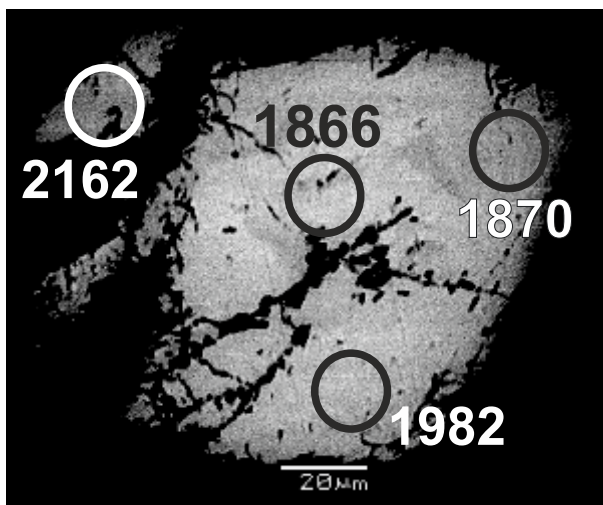

PSH\$-2017-17 g 7

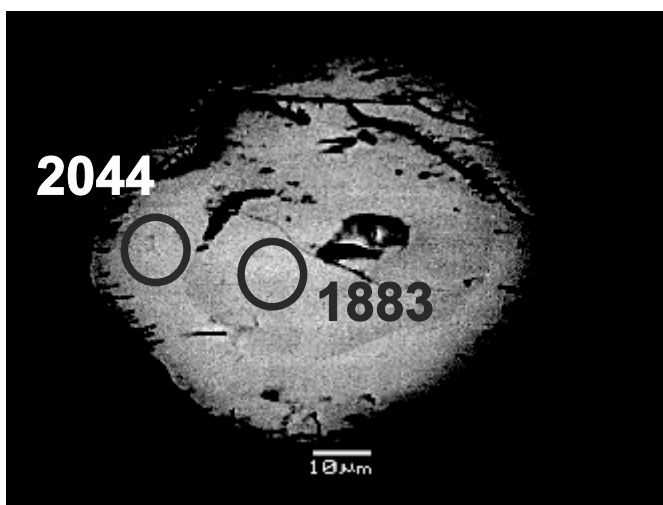

PSH\$-2017-17 g 9

Appendix 6. Selected SEM images of analyzed monazite grains. g X is for the grain and analysis spot presented in Appendix 2b.
