# Supplementary material
Source: publisher figshare collection journal article supplement (https://tandf.figshare.com/articles/dataset/_/11734173)
Supplement: Supplementary file 3 [file 1]

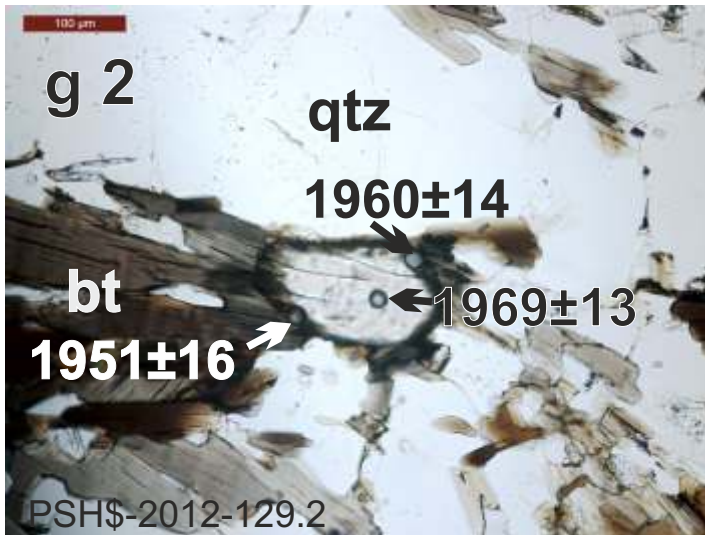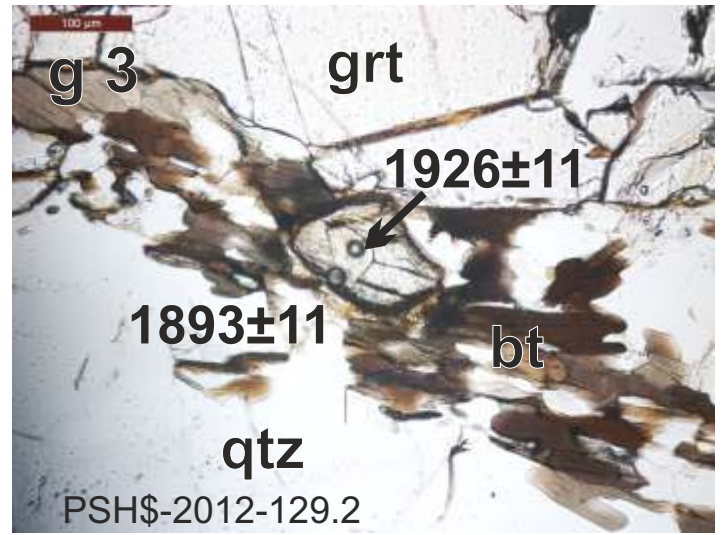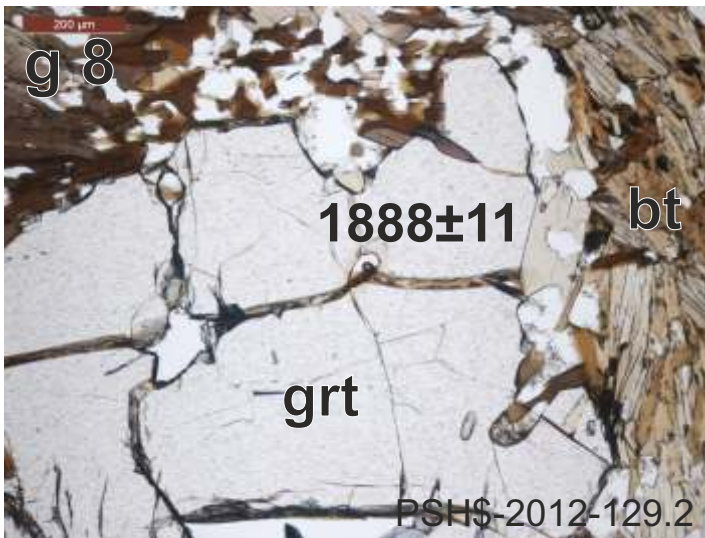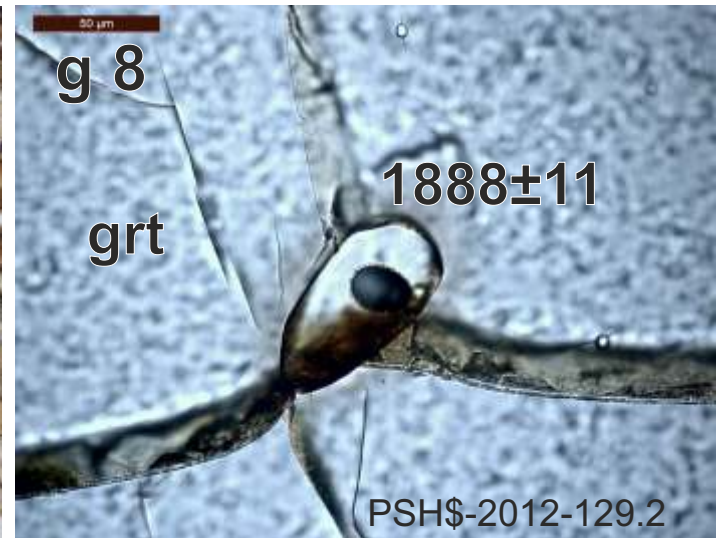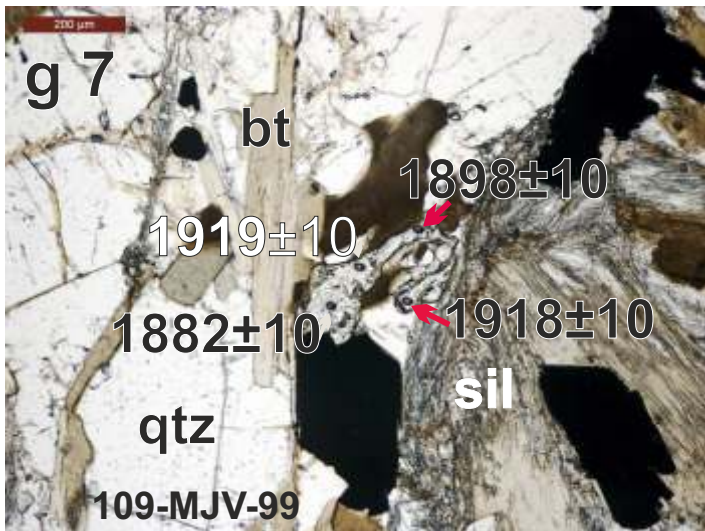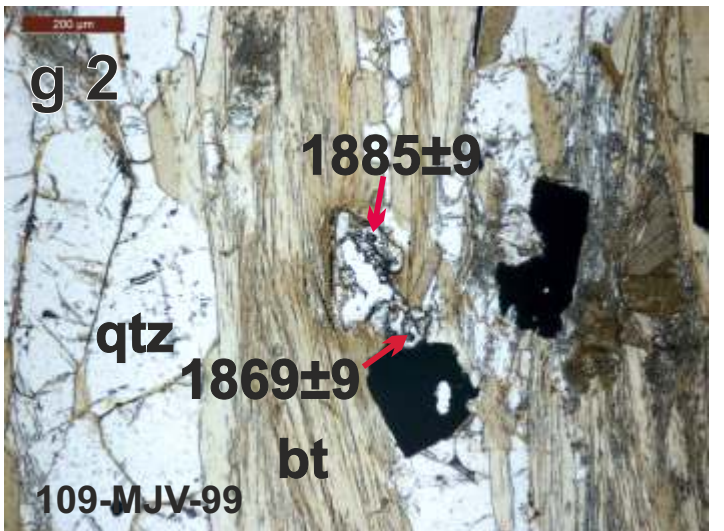

Appendix 7. Microphotographs of dated monazite grains in the sample PSH-2013-129.2 and 109-MJV-99 (the lowermost two photographs). Plane-polarized light. The scale bar in the upper left corner is 100  $\mu\text{m}$  in the figures g 2 and g 3, 200  $\mu\text{m}$  in the figure g 8 in the left and 50  $\mu\text{m}$  in the figure g 8 in the right. In the
