# Supplementary material
Source: publisher figshare collection journal article supplement (https://tandf.figshare.com/articles/dataset/_/11734173)
Supplement: Supplementary file 4 [file 1]

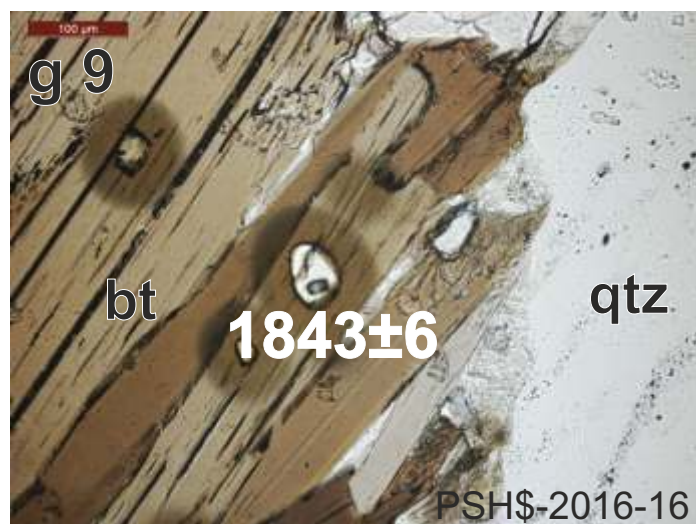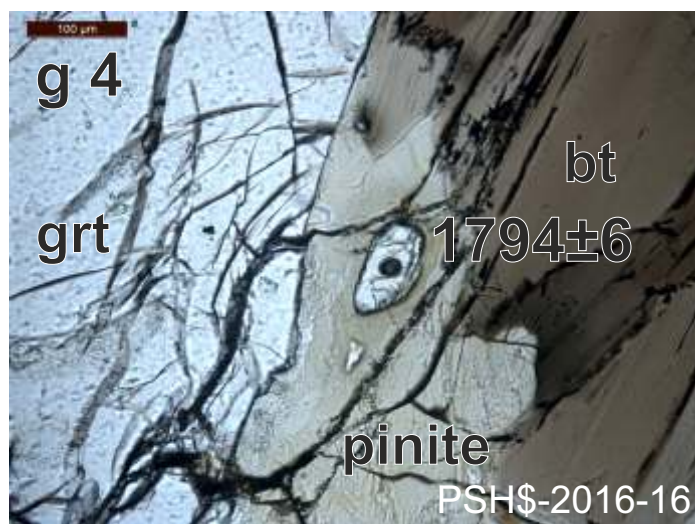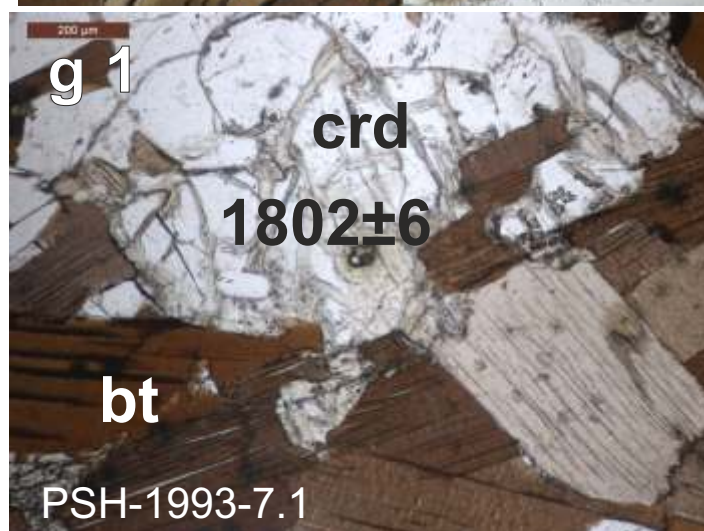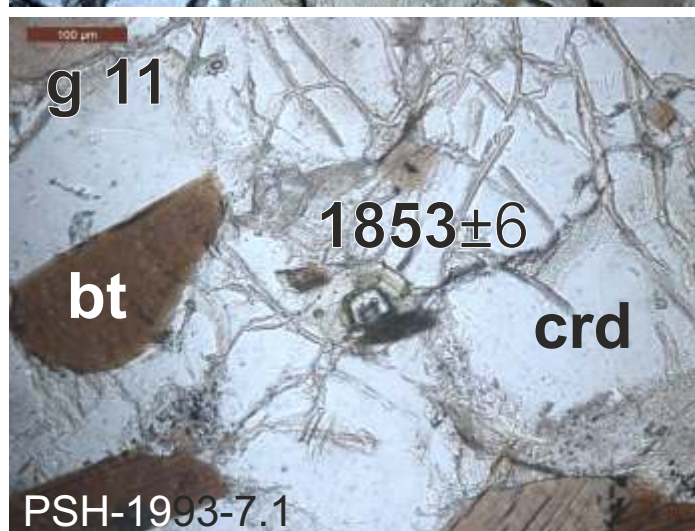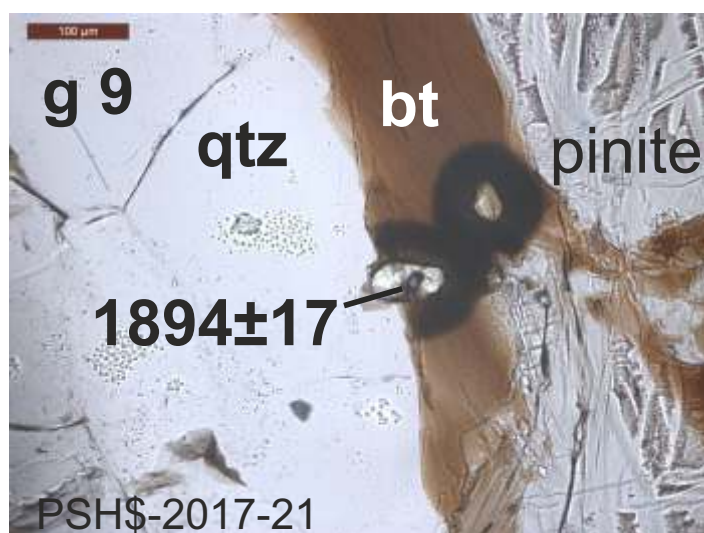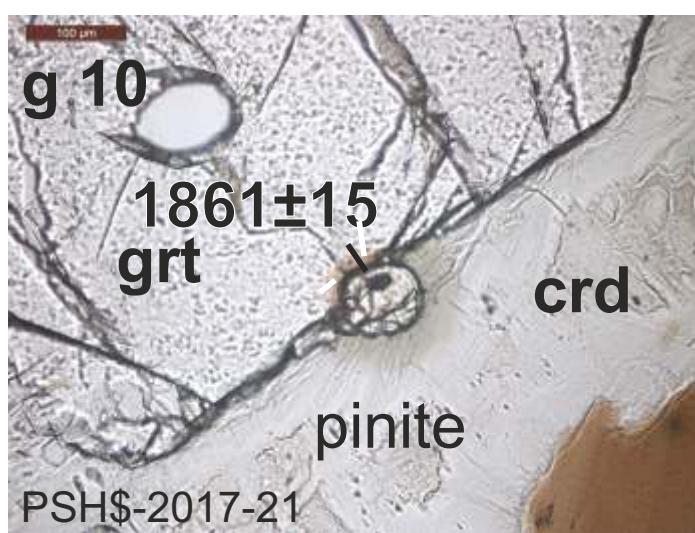

Appendix 10. Microphotographs of dated monazites in the samples PSH\$-2016-16, PSH\$-1993-7.1, and PSH\$-2014-21. In the figure g 1 the scale bar is 200 µm, in the other microphotographs 100 µm. The  $^{207}\text{Pb}/^{206}\text{Pb}$  age of the analysis spot is shown with the  $2\sigma$  error.
