# Supplementary material
Source: publisher figshare collection journal article supplement (https://tandf.figshare.com/articles/dataset/_/11734173)
Supplement: Supplementary file 5 [file 1]

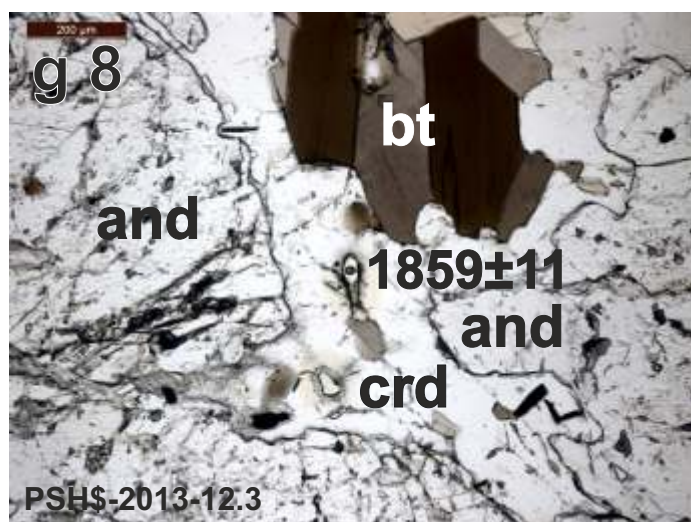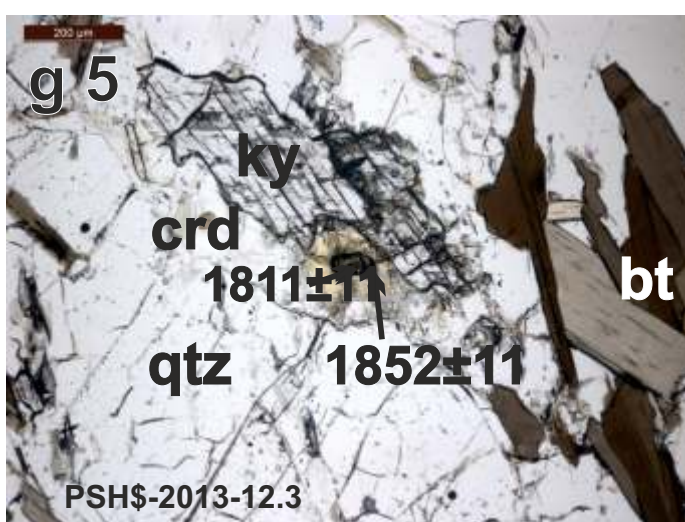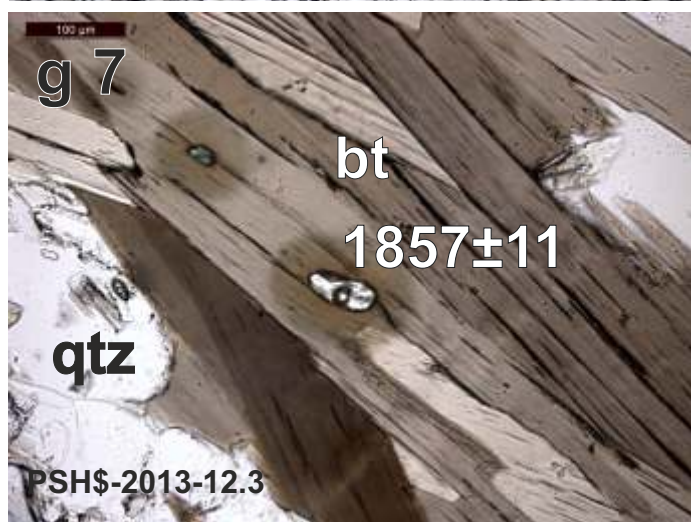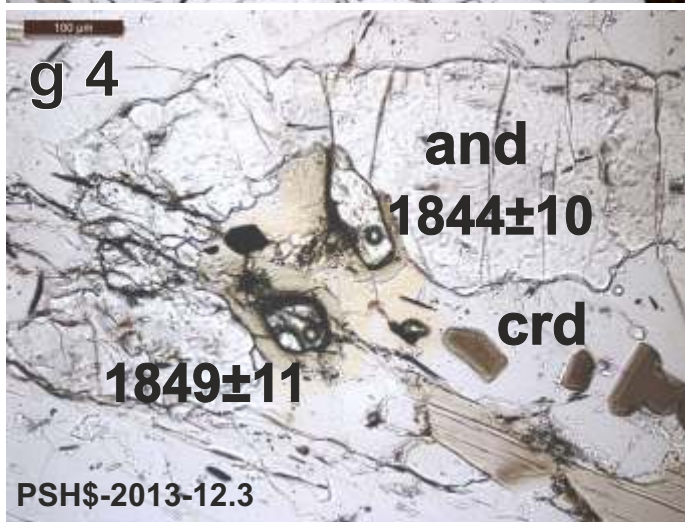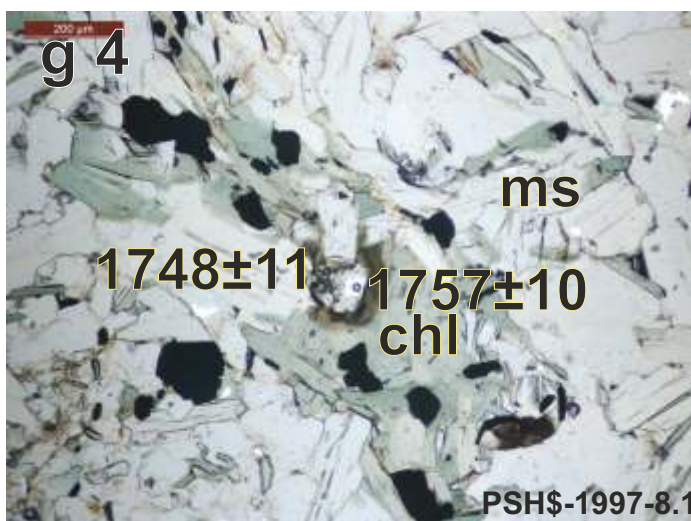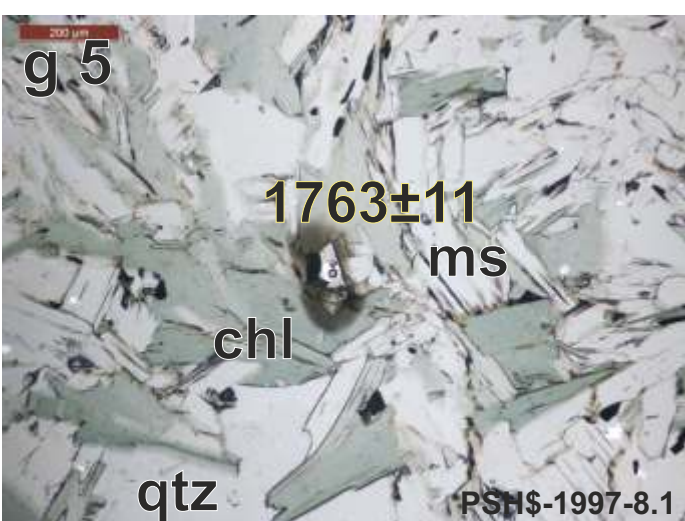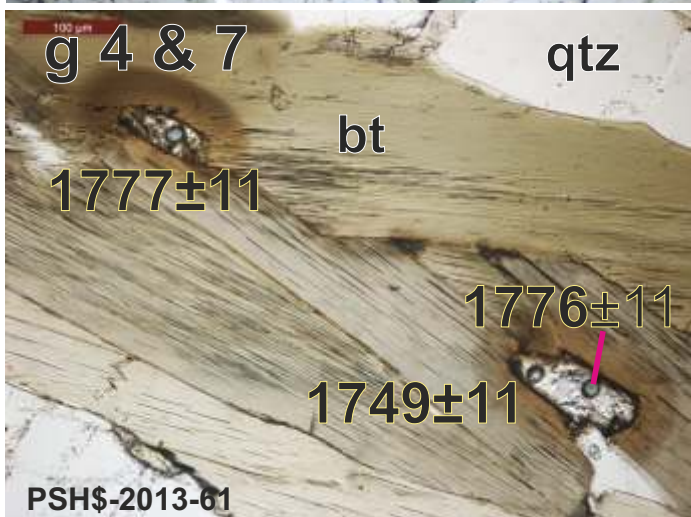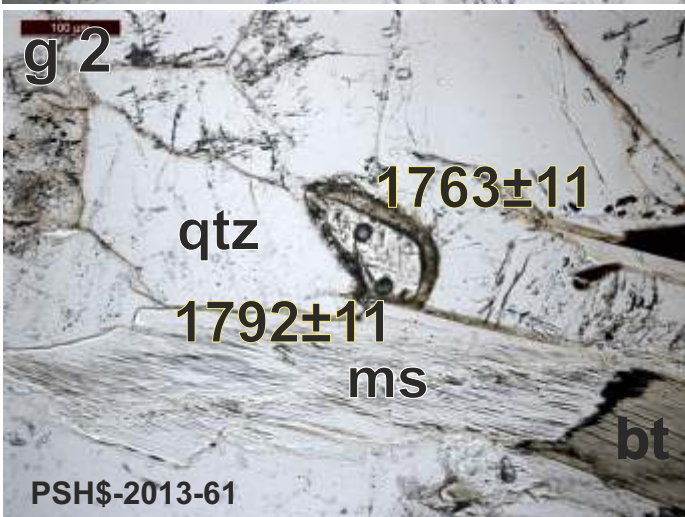

Appendix 8. Microphotographs of dated monazite grains from the Central Lapland samples from the samples PSH-2013-12.3, PSH\$-1997-8.1 and PSH\$-2013-61. The scale bar in the Figs g 8, g 5 (upper), g 4 and g 5 (lower) is 200 µm, in other figures 100 µm.
