# Supplementary material
Source: publisher figshare collection journal article supplement (https://tandf.figshare.com/articles/dataset/_/11734173)
Supplement: Supplementary file 6 [file 1]

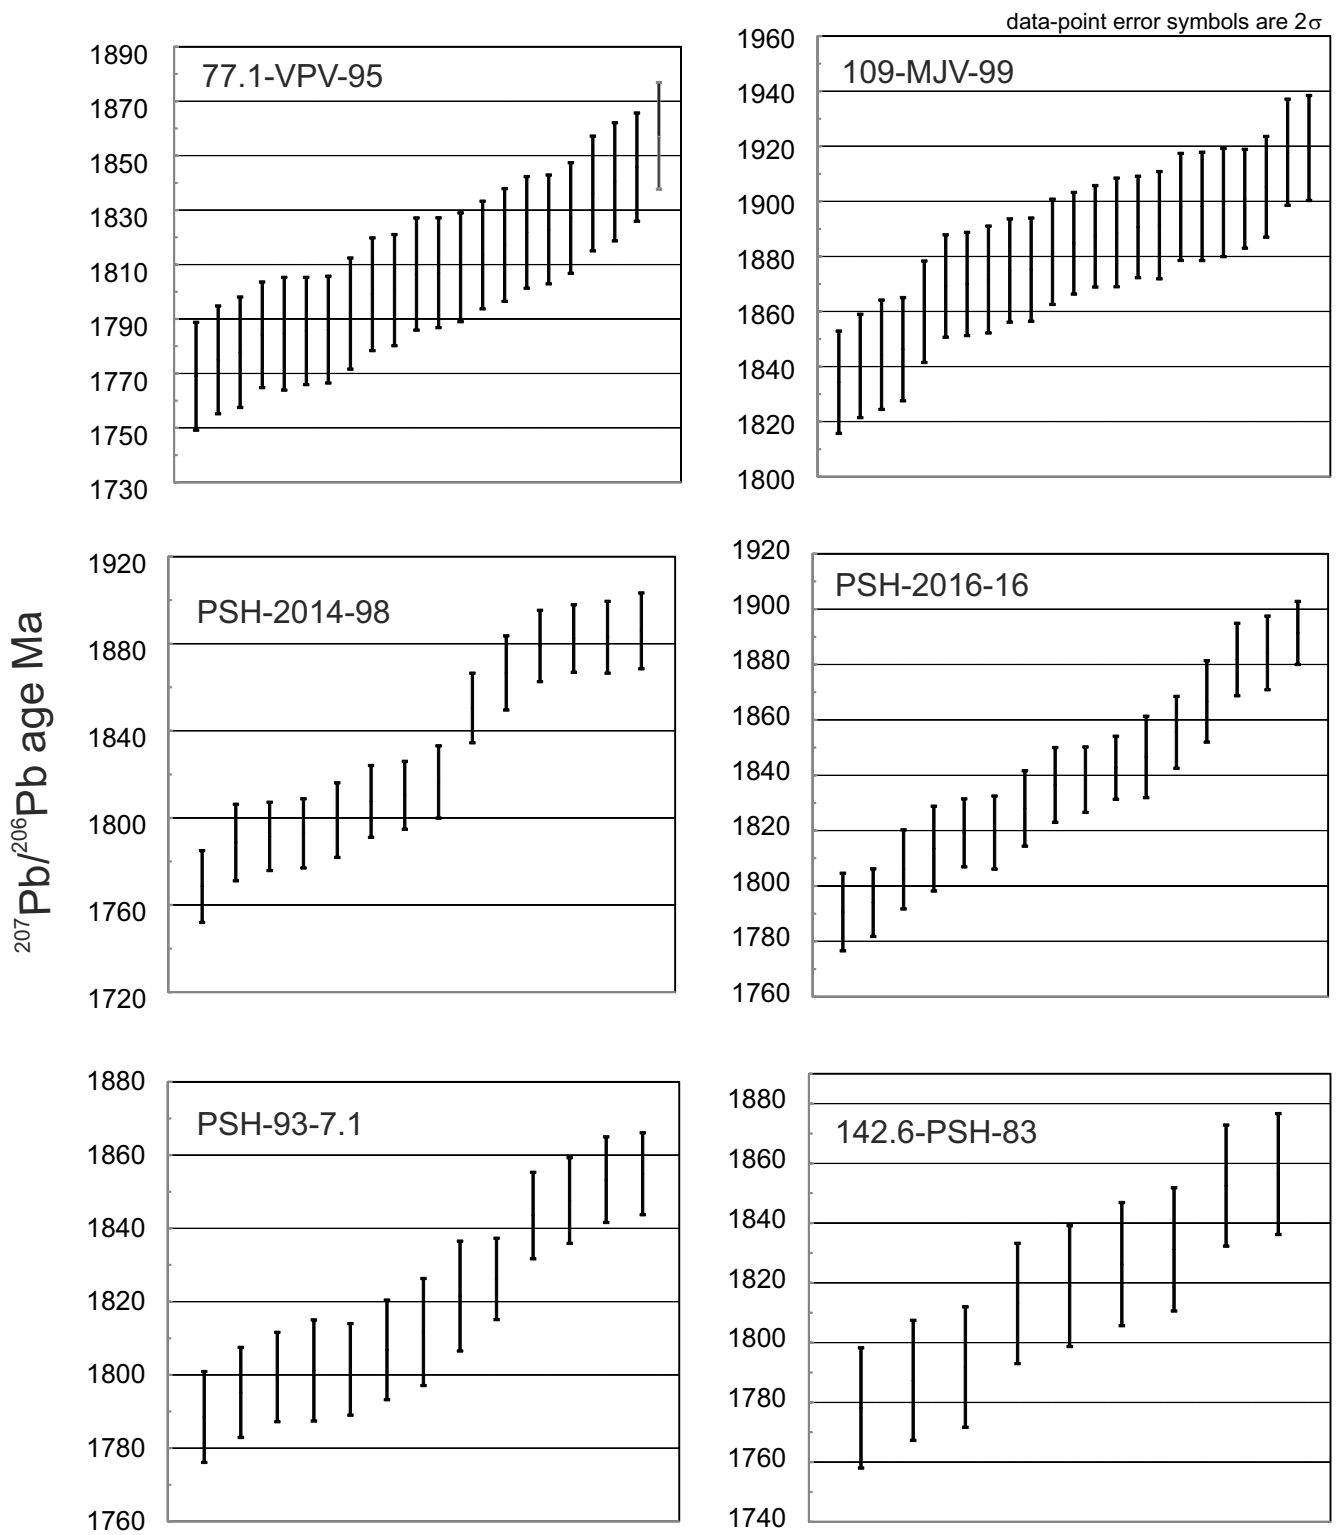

Appendix 5. Examples of  $^{207}\text{Pb}/^{206}\text{Pb}$  age spread yielded by monazite grains within the same thin section. The error bars are  $2\sigma$  in each figure.
