# Supplementary material
Source: publisher figshare collection journal article supplement (https://tandf.figshare.com/articles/dataset/_/11734173)
Supplement: Supplementary file 7 [file 1]

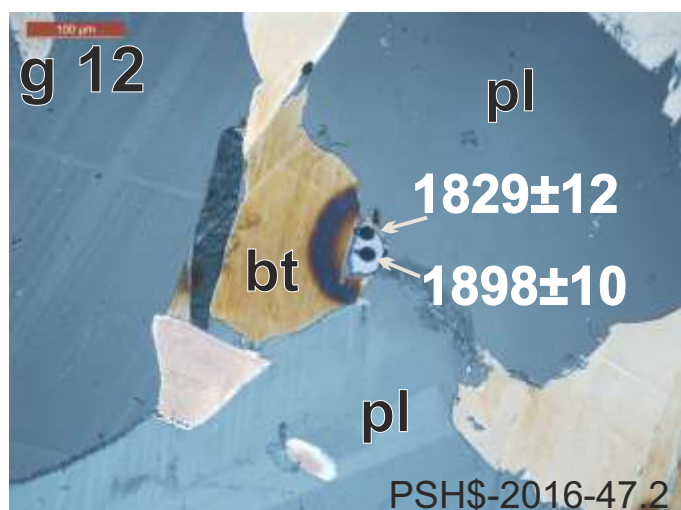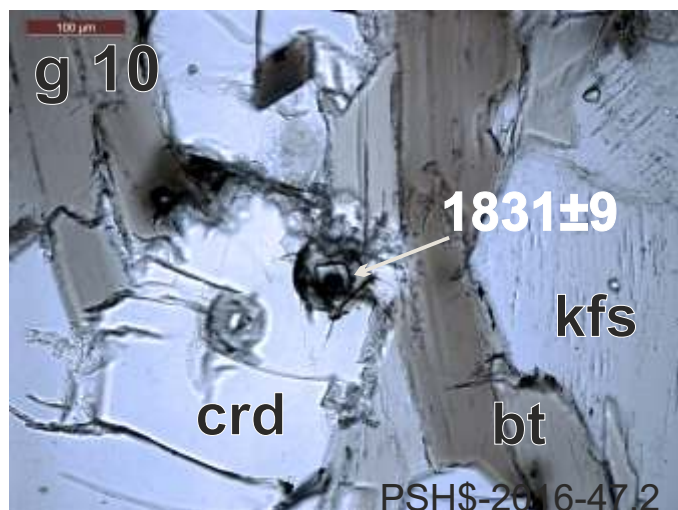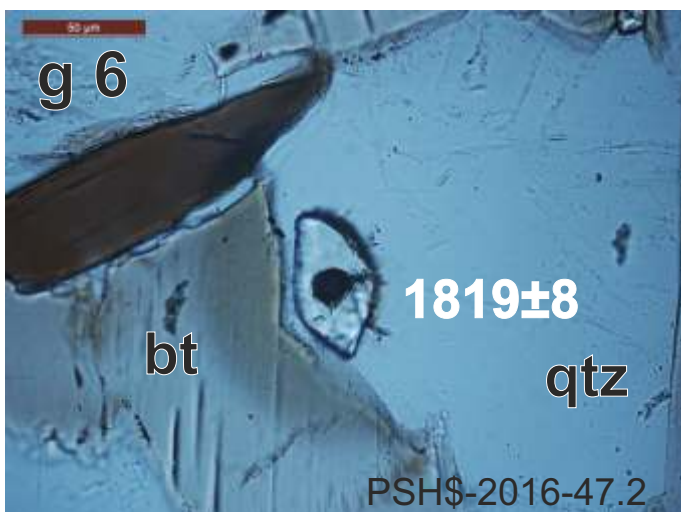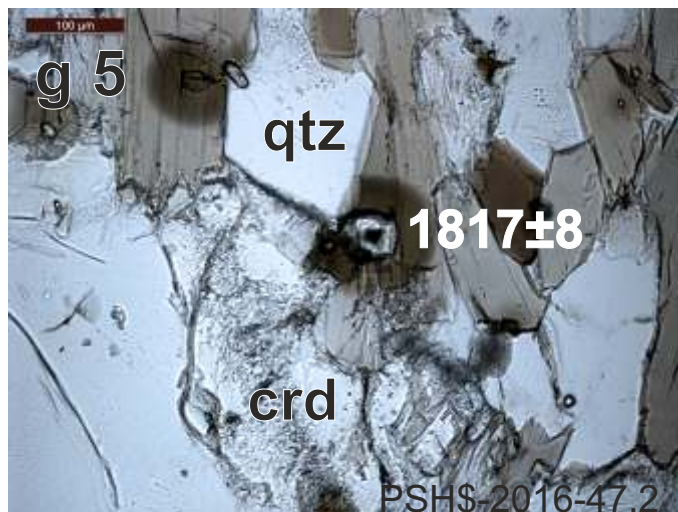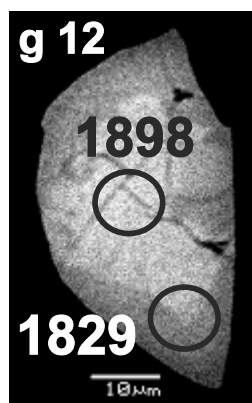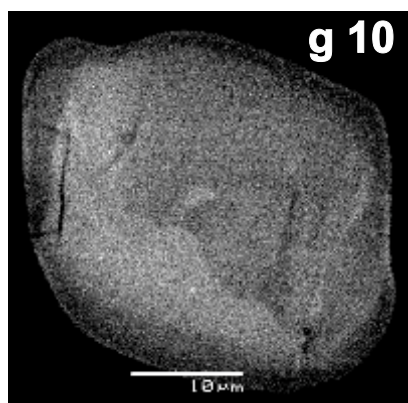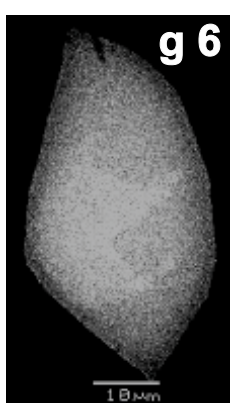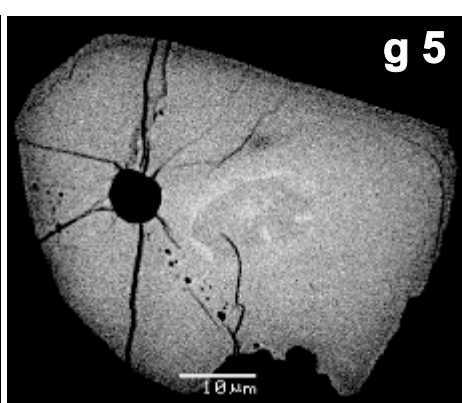

Appendix 9. Microphotographs and SEM images of dated monazite grains in the sample PSH-2014-47.2. In the microphotograph g 6 the scale bar is 50 µm, in the other microphotographs 100 µm. The  $^{207}\text{Pb}/^{206}\text{Pb}$  age of the analysis spot is shown with the  $2\sigma$  error.
